# Supplementary material for: Hypoxia Induced Impairment of NK Cell Cytotoxicity against Multiple Myeloma Can Be Overcome by IL-2 Activation of the NK Cells
Source: PubMed Central journal article supplement (PMC3665801; doi:10.1371/journal.pone.0064835), 2013-05-28

Figure S2

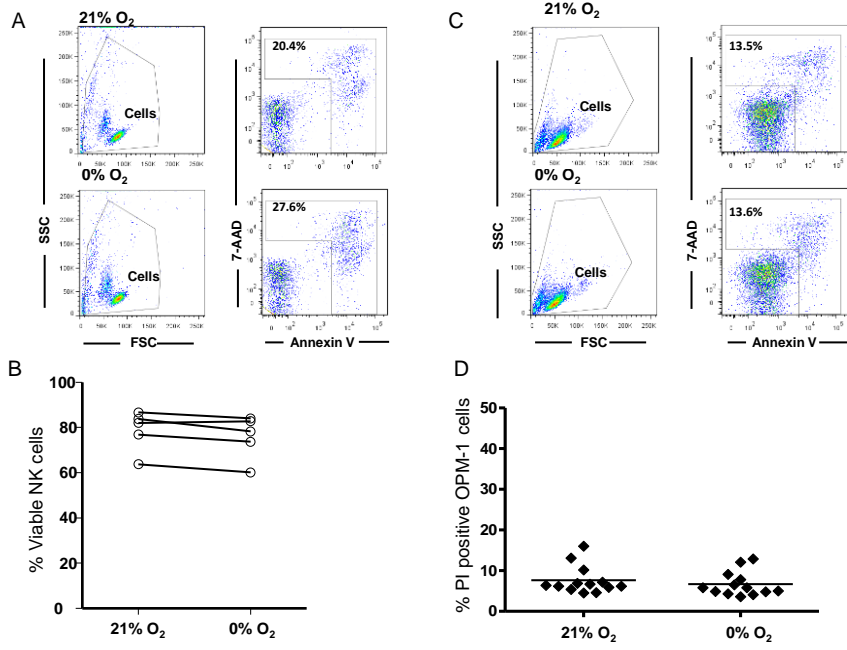

Supplement: pone.0064835.s002.pdf [file pone.0064835.s002.pdf]
