# Supplementary material for: Hypoxia Induced Impairment of NK Cell Cytotoxicity against Multiple Myeloma Can Be Overcome by IL-2 Activation of the NK Cells
Source: PubMed Central journal article supplement (PMC3665801; doi:10.1371/journal.pone.0064835), 2013-05-28
Supplement: pone.0064835.s004.pdf [file pone.0064835.s004.pdf]

Figure S4

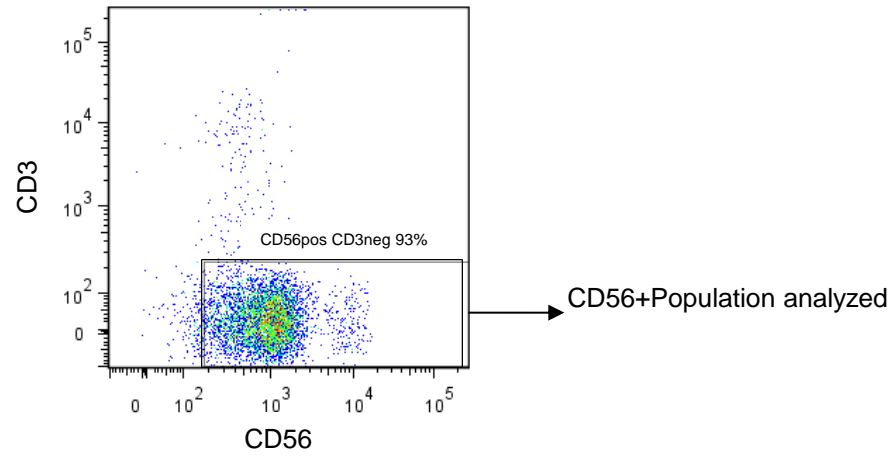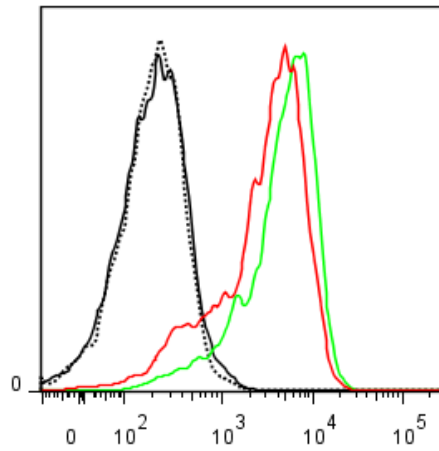

**Intracellular Perforin**

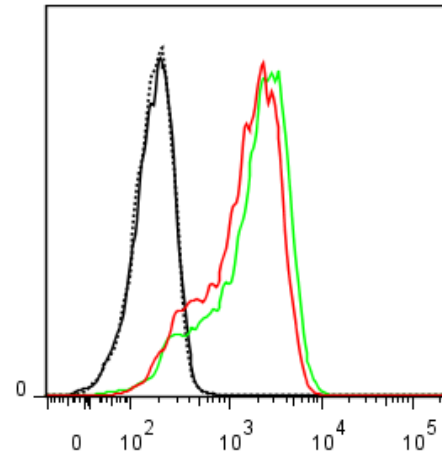

**Intracellular Granzyme B**
