# Supplementary material for: Hypoxia Induced Impairment of NK Cell Cytotoxicity against Multiple Myeloma Can Be Overcome by IL-2 Activation of the NK Cells
Source: PubMed Central journal article supplement (PMC3665801; doi:10.1371/journal.pone.0064835), 2013-05-28
Supplement: pone.0064835.s007.pdf [file pone.0064835.s007.pdf]

Table S1. List of antibodies

| <b>Name</b> | <b>Dye</b>   | <b>Clone</b> | <b>Company</b>       |
|-------------|--------------|--------------|----------------------|
| HLA-E       | PE           | 3D12HLA-E    | eBioScience          |
| HLA-ABC     | APC          | G46-2.6      | BD Pharmingen        |
| MICA        | PE           | 159227       | R&D SYSTEMS          |
| MICB        | APC          | 2356511      | R&D SYSTEMS          |
| ULBP1       | PE           | 170818       | R&D SYSTEMS          |
| ULBP2       | APC          | 165903       | R&D SYSTEMS          |
| CD3         | APC H7       | SK7          | BD Pharmingen        |
| CD16        | FITC         | 3G8          | BD Pharmingen        |
| CD56        | Horizon V450 | B159         | BD Pharmingen        |
| DNAM-1      | APC          | 102511       | R&D SYSTEMS          |
| KIR2DL1     | PE           | 143211       | R&D SYSTEMS          |
| KIR2DL2/3   | APC          | DX27         | Miltenyi Biotec      |
| KIR3DL1     | FITC         | DX9          | Miltenyi Biotec      |
| LFA1        | FITC         | HI111        | BD Pharmingen        |
| NKG2A       | PE-Cy5.5     | Z199         | Beckman Coulter Inc. |
| NKG2C       | PE           | 134591       | R&D SYSTEMS          |
| NKG2D       | APC          | BAT221       | Miltenyi Biotec      |
| NKp30       | PE           | 210845       | R&D SYSTEMS          |
| NKp46       | APC          | 9E2/NKp46    | BD Pharmingen        |
| NKp80       | APC          | 239127       | R&D SYSTEMS          |
| 2B4         | PE           | Polycl.      | R&D SYSTEMS          |
| Perforin    | PE           | δG9          | BD Pharmingen        |
| Granzyme B  | FITC         | GB11         | BD Pharmingen        |
| GLUT1       | APC          | 202915       | R&D SYSTEMS          |
| CAIX        | FITC         | 303123       | R&D SYSTEMS          |
